# Supplementary material for: Allergen-specific circulating CLA+ memory T cells stratify IL-22 response in atopic dermatitis skin
Source: Front Immunol. 2025 Jul 1;16:1599892. doi: 10.3389/fimmu.2025.1599892 (PMC12259416; doi:10.3389/fimmu.2025.1599892)
Supplement: Supplementary file 2 [file DataSheet1.xlsx]

## Sheet: IL22
Sample	Assay	Ct Value	Mean Ct IL22	Mean Ct RPLP0	Normalization (1,8e(Ct RPLP0 - Ct gene)*10000)
AD1	IL22	25.3541	25.6434	11.93	3.16
AD1	IL22	25.9327
AD2	IL22	20.9988	21.0707	12.66	71.32
AD2	IL22	21.1426
AD3	IL22	26.4689	26.5103	13.42	4.55
AD3	IL22	26.5517
AD4	IL22	24.518	24.3698	11.92	6.64
AD4	IL22	24.2216
AD5	IL22	23.8419	24.0184	11.41	6.05
AD5	IL22	24.1951
AD6	IL22	24.1775	24.2894	12.32	8.81
AD6	IL22	24.4013
AD7	IL22	27.8535	27.9202	14.14	3.04
AD7	IL22	27.9868
AD8	IL22	23.1617	23.1629	12.16	15.53
AD8	IL22	23.1641
AD9	IL22	20.772	21.0741	11.45	34.93
AD9	IL22	21.3762
AD10	IL22	23.8107	23.6873	11.82	9.35
AD10	IL22	23.5639
AD11	IL22	23.7362	23.7661	12.46	12.97
AD11	IL22	23.7961
AD12	IL22	25.913	25.8546	11.32	1.95
AD12	IL22	25.7962
AD13	IL22	23.9602	23.9629	11.88	8.22
AD13	IL22	23.9655
AD14	IL22	23.1699	23.1827	13.83	40.95
AD14	IL22	23.1956
AD15	IL22	21.9639	21.9573	11.83	26.01
AD15	IL22	21.9507
AD16	IL22	25.7332	25.7027	11.66	2.6
AD16	IL22	25.6721
AD17	IL22	21.8315	21.8861	11	16.63
AD17	IL22	21.9406
AD18	IL22	26.6851	26.6829	9.97	0.54
AD18	IL22	26.6808
AD19	IL22	20.1441	20.209	10.05	25.53
AD19	IL22	20.2739
AD20	IL22	23.4385	23.3606	11.99	12.5
AD20	IL22	23.2827
AD21	IL22	25.1893	25.1836	12.15	4.7
AD21	IL22	25.1779
AD22	IL22	29.8065	29.8536	12.84	0.45
AD22	IL22	29.9007
AD23	IL22	26.2055	26.1969	13.61	6.13
AD23	IL22	26.1883
AD24	IL22	23.175	23.1623	12.99	25.37
AD24	IL22	23.1496
AD25	IL22	21.5903	21.5424	10.41	14.42
AD25	IL22	21.4945
AD26	IL22	29.7055	29.6543	10.09	0.1
AD26	IL22	29.6031
AD27	IL22	31.5058	31.5459	10.36	0.04
AD27	IL22	31.586
AD28	IL22	27.9291	27.9202	11.22	0.55
AD28	IL22	27.9113
AD29	IL22	20.4258	20.3993	9.16	13.51
AD29	IL22	20.3728
AD30	IL22	23.3967	23.3674	10.39	4.87
AD30	IL22	23.3382
AD31	IL22	21.48	21.4573	10.25	13.74
AD31	IL22	21.4345
AD32	IL22	24.1994	24.2162	9.58	1.83
AD32	IL22	24.2331
AD33	IL22	28.9731	28.9506	16.68	7.39
AD33	IL22	28.9281
AD34	IL22	22.0178	22.0376	9.91	8.04
AD34	IL22	22.0573
AD35	IL22	20.3443	20.2654	10.78	37.89
AD35	IL22	20.1865
AD36	IL22	23.2626	23.3652	12.13	13.55
AD36	IL22	23.4677
AD37	IL22	26.8134	26.7505	11.4	1.21
AD37	IL22	26.6877
AD38	IL22	28.4132	28.4151	12.9	1.09
AD38	IL22	28.4169
AD39	IL22	25.3958	25.4023	11.18	2.34
AD39	IL22	25.4088
AD40	IL22	22.8888	22.9194	10.3	6.02
AD40	IL22	22.9499
AD41	IL22	Undetermined	Undetermined	15.34	Undetermined
AD41	IL22	Undetermined
HC1	IL22	30.1371	30.127	11.57	0.18
HC1	IL22	30.117
HC2	IL22	28.9378	28.9138	13.12	0.93
HC2	IL22	28.8898
HC3	IL22	Undetermined	Undetermined	13.84	Undetermined
HC3	IL22	Undetermined
HC4	IL22	Undetermined	Undetermined	13.28	Undetermined
HC4	IL22	Undetermined
HC5	IL22	32.1378	32.1557	12.49	0.1
HC5	IL22	32.1737
HC6	IL22	30.8412	30.9101	13.43	0.34
HC6	IL22	30.9791
HC7	IL22	29.9697	30.0256	11.67	0.21
HC7	IL22	30.0815
HC8	IL22	32.1719	32.2385	12.67	0.1
HC8	IL22	32.305

## Sheet: IL20
Sample	Assay	Ct Value	Mean Ct IL20	Mean Ct RPLP0	Normalization (1,8e(Ct RPLP0 - Ct gene)*10000)
AD1	IL20	25.111	25.1582	11.93	4.2
AD1	IL20	25.2053
AD2	IL20	20.9647	20.9468	12.66	76.71
AD2	IL20	20.9289
AD3	IL20	25.351	25.2924	13.42	9.34
AD3	IL20	25.2338
AD4	IL20	25.0131	24.977	11.92	4.64
AD4	IL20	24.9409
AD5	IL20	22.9537	23.0174	11.41	10.89
AD5	IL20	23.0812
AD6	IL20	22.4674	22.4659	12.32	25.72
AD6	IL20	22.4644
AD7	IL20	27.5481	27.7149	14.14	3.43
AD7	IL20	27.8816
AD8	IL20	25.4676	25.413	12.16	4.14
AD8	IL20	25.3584
AD9	IL20	23.6854	23.5759	11.45	8.02
AD9	IL20	23.4664
AD10	IL20	25.7473	25.7879	11.82	2.72
AD10	IL20	25.8285
AD11	IL20	24.4543	24.508	12.46	8.39
AD11	IL20	24.5616
AD12	IL20	24.5606	24.5447	11.32	4.2
AD12	IL20	24.5287
AD13	IL20	25.9789	25.9648	11.88	2.53
AD13	IL20	25.9507
AD14	IL20	27.544	27.6764	13.83	2.92
AD14	IL20	27.8086
AD15	IL20	25.4966	25.4938	11.83	3.25
AD15	IL20	25.491
AD16	IL20	24.9619	25.2408	11.66	3.41
AD16	IL20	25.5197
AD17	IL20	22.9274	22.9129	11	9.1
AD17	IL20	22.8984
AD18	IL20	27.8181	27.8777	9.97	0.27
AD18	IL20	27.9374
AD19	IL20	21.6325	21.6208	10.05	11.13
AD19	IL20	21.609
AD20	IL20	23.4396	23.3737	11.99	12.4
AD20	IL20	23.3079
AD21	IL20	21.2027	21.1224	12.15	51.1
AD21	IL20	21.0421
AD22	IL20	29.1625	29.1038	12.84	0.71
AD22	IL20	29.045
AD23	IL20	26.4459	26.4619	13.61	5.24
AD23	IL20	26.4778
AD24	IL20	21.8517	21.8927	12.99	53.5
AD24	IL20	21.9338
AD25	IL20	20.4956	20.5848	10.41	25.31
AD25	IL20	20.674
AD26	IL20	28.3449	28.2896	10.09	0.23
AD26	IL20	28.2342
AD27	IL20	22.9803	23.0115	10.36	5.9
AD27	IL20	23.0426
AD28	IL20	25.4095	25.3861	11.22	2.42
AD28	IL20	25.3627
AD29	IL20	22.06	22.0262	9.16	5.19
AD29	IL20	21.9925
AD30	IL20	23.4177	23.365	10.39	4.87
AD30	IL20	23.3123
AD31	IL20	19.7815	19.7921	10.25	36.57
AD31	IL20	19.8028
AD32	IL20	24.8107	24.7001	9.58	1.38
AD32	IL20	24.5896
AD33	IL20	30.5603	30.5195	16.68	2.94
AD33	IL20	30.4787
AD34	IL20	21.1278	21.1094	9.91	13.87
AD34	IL20	21.0911
AD35	IL20	20.2211	20.1616	10.78	40.28
AD35	IL20	20.1022
AD36	IL20	24.1843	24.1977	12.13	8.31
AD36	IL20	24.2111
AD37	IL20	25.2852	25.2572	11.4	2.9
AD37	IL20	25.2292
AD38	IL20	28.1459	28.113	12.9	1.31
AD38	IL20	28.0801
AD39	IL20	25.4106	25.3764	11.18	2.38
AD39	IL20	25.3423
AD40	IL20	23.1028	23.0748	10.3	5.5
AD40	IL20	23.0469
AD41	IL20	28.5196	28.4932	15.34	4.39
AD41	IL20	28.4668
HC1	IL20	24.6641	24.6901	11.57	4.46
HC1	IL20	24.7162
HC2	IL20	24.9669	24.9748	13.12	9.41
HC2	IL20	24.9826
HC3	IL20	28.7075	28.663	13.84	1.64
HC3	IL20	28.6184
HC4	IL20	27.9661	27.98	13.28	1.77
HC4	IL20	27.9938
HC5	IL20	27.1095	27.1234	12.49	1.84
HC5	IL20	27.1372
HC6	IL20	30.3129	30.1407	13.43	0.54
HC6	IL20	29.9685
HC7	IL20	23.7778	23.7997	11.67	8
HC7	IL20	23.8217
HC8	IL20	27.9705	27.9136	12.67	1.28
HC8	IL20	27.8567

## Sheet: IL13
Sample	Assay	Ct Value	Mean Ct IL13	Mean Ct RPLP0	Normalization (1,8e(Ct RPLP0 - Ct gene)*10000)
AD1	IL13	23.9193	23.8979	11.93	8.81
AD1	IL13	23.8765
AD2	IL13	21.2251	21.6212	12.66	51.58
AD2	IL13	22.0173
AD3	IL13	25.049	24.9723	13.42	11.25
AD3	IL13	24.8956
AD4	IL13	22.5308	22.3512	11.92	21.74
AD4	IL13	22.1716
AD5	IL13	22.013	21.9603	11.41	20.27
AD5	IL13	21.9076
AD6	IL13	22.2841	22.3593	12.32	27.38
AD6	IL13	22.4346
AD7	IL13	27.3395	27.3908	14.14	4.15
AD7	IL13	27.442
AD8	IL13	22.5678	22.6015	12.16	21.61
AD8	IL13	22.6352
AD9	IL13	19.615	19.5122	11.45	87.49
AD9	IL13	19.4094
AD10	IL13	23.3153	23.5435	11.82	10.2
AD10	IL13	23.7717
AD11	IL13	24.6421	24.7978	12.46	7.08
AD11	IL13	24.9535
AD12	IL13	26.518	26.4673	11.32	1.36
AD12	IL13	26.4165
AD13	IL13	23.5729	23.5228	11.88	10.64
AD13	IL13	23.4728
AD14	IL13	23.9444	23.9145	13.9	27.85
AD14	IL13	23.8845
AD15	IL13	21.8825	21.922	11.88	27.36
AD15	IL13	21.9615
AD16	IL13	23.5661	23.6433	11.38	7.4
AD16	IL13	23.7206
AD17	IL13	21.7168	21.6263	10.96	18.94
AD17	IL13	21.5358
AD18	IL13	26.1019	26.0302	9.97	0.8
AD18	IL13	25.9585
AD19	IL13	21.9231	21.8937	10.05	9.48
AD19	IL13	21.8643
AD20	IL13	23.4088	23.4545	11.99	11.83
AD20	IL13	23.5002
AD21	IL13	23.1135	23.1529	12.15	15.49
AD21	IL13	23.1923
AD22	IL13	26.465	26.4583	12.84	3.34
AD22	IL13	26.4516
AD23	IL13	25.7663	25.7853	13.61	7.8
AD23	IL13	25.8044
AD24	IL13	22.0563	22.0989	12.99	47.4
AD24	IL13	22.1414
AD25	IL13	20.9325	20.8944	10.41	21.1
AD25	IL13	20.8563
AD26	IL13	28.1187	28.0894	10.09	0.25
AD26	IL13	28.06
AD27	IL13	28.9676	28.9786	10.36	0.18
AD27	IL13	28.9895
AD28	IL13	22.4235	22.402	11.22	13.99
AD28	IL13	22.3804
AD29	IL13	20.1655	20.1339	9.16	15.8
AD29	IL13	20.1023
AD30	IL13	22.7605	22.7192	10.19	6.34
AD30	IL13	22.6779
AD31	IL13	21.2613	21.3209	10.19	14.4
AD31	IL13	21.3804
AD32	IL13	23.7755	23.7386	9.33	2.1
AD32	IL13	23.7017
AD33	IL13	31.0328	30.9422	16.54	2.1
AD33	IL13	30.8516
AD34	IL13	21.493	21.539	9.34	7.71
AD34	IL13	21.585
AD35	IL13	21.1479	21.1366	10.67	21.29
AD35	IL13	21.1252
AD36	IL13	22.7154	22.6729	12.01	18.95
AD36	IL13	22.6303
AD37	IL13	24.2479	24.2901	11.29	4.79
AD37	IL13	24.3323
AD38	IL13	26.3305	26.338	12.84	3.58
AD38	IL13	26.3455
AD39	IL13	23.7853	23.759	10.96	5.42
AD39	IL13	23.7327
AD40	IL13	20.7743	20.8042	10.04	17.84
AD40	IL13	20.8341
AD41	IL13	Undetermined	Undetermined	15.34	Undetermined
AD41	IL13	Undetermined
HC1	IL13	29.073	29.029	11.48	0.33
HC1	IL13	28.985
HC2	IL13	28.3074	28.2812	13.07	1.31
HC2	IL13	28.2549
HC3	IL13	33.2159	33.1638	13.84	0.12
HC3	IL13	33.1117
HC4	IL13	33.1724	33.1842	13.28	0.08
HC4	IL13	33.196
HC5	IL13	30.3244	30.2837	12.49	0.29
HC5	IL13	30.243
HC6	IL13	31.4975	31.5248	13.43	0.24
HC6	IL13	31.5521
HC7	IL13	30.973	31.0503	11.67	0.11
HC7	IL13	31.1276
HC8	IL13	29.961	29.9754	12.67	0.38
HC8	IL13	29.9898

## Sheet: IL17A
Sample	Assay	Ct Value	Mean Ct IL17A	Mean Ct RPLP0	Normalization (1,8e(Ct RPLP0 - Ct gene)*10000)
AD1	IL17A	Undetermined	35.1997	11.93	0.01
AD1	IL17A	35.1997
AD2	IL17A	25.328	25.1511	12.66	6.48
AD2	IL17A	24.9742
AD3	IL17A	Undetermined	33.9267	13.42	0.06
AD3	IL17A	33.9267
AD4	IL17A	30.2779	30.3211	11.92	0.2
AD4	IL17A	30.3643
AD5	IL17A	26.541	26.5892	11.41	1.33
AD5	IL17A	26.6374
AD6	IL17A	27.7835	27.8745	12.32	1.07
AD6	IL17A	27.9654
AD7	IL17A	Undetermined	35.162	14.14	0.04
AD7	IL17A	35.162
AD8	IL17A	29.3581	29.3934	12.16	0.4
AD8	IL17A	29.4286
AD9	IL17A	25.6676	25.6218	11.45	2.41
AD9	IL17A	25.5759
AD10	IL17A	27.9477	28.004	11.82	0.74
AD10	IL17A	28.0603
AD11	IL17A	Undetermined	Undetermined	12.46	Undetermined
AD11	IL17A	Undetermined
AD12	IL17A	28.011	27.9975	11.32	0.55
AD12	IL17A	27.9841
AD13	IL17A	30.9278	30.9189	11.88	0.14
AD13	IL17A	30.91
AD14	IL17A	30.3959	30.3409	13.9	0.64
AD14	IL17A	30.286
AD15	IL17A	30.8841	30.9018	11.88	0.14
AD15	IL17A	30.9194
AD16	IL17A	30.7489	30.8074	11.38	0.11
AD16	IL17A	30.866
AD17	IL17A	29.9277	29.9196	10.96	0.14
AD17	IL17A	29.9115
AD18	IL17A	30.9777	31.0392	9.97	0.04
AD18	IL17A	31.1007
AD19	IL17A	24.4857	24.5769	10.05	1.96
AD19	IL17A	24.6681
AD20	IL17A	29.9249	29.9392	11.99	0.26
AD20	IL17A	29.9534
AD21	IL17A	29.3865	29.4652	12.15	0.38
AD21	IL17A	29.544
AD22	IL17A	Undetermined	Undetermined	12.84	Undetermined
AD22	IL17A	Undetermined
AD23	IL17A	Undetermined	Undetermined	13.61	Undetermined
AD23	IL17A	Undetermined
AD24	IL17A	28.6904	28.7115	12.99	0.97
AD24	IL17A	28.7326
AD25	IL17A	Undetermined	28.186	10.41	0.29
AD25	IL17A	28.186
AD26	IL17A	26.1874	26.1945	10.09	0.78
AD26	IL17A	26.2017
AD27	IL17A	Undetermined	Undetermined	10.36	Undetermined
AD27	IL17A	Undetermined
AD28	IL17A	Undetermined	Undetermined	11.22	Undetermined
AD28	IL17A	Undetermined
AD29	IL17A	25.1366	25.1346	9.16	0.84
AD29	IL17A	25.1325
AD30	IL17A	28.5361	28.4508	10.19	0.22
AD30	IL17A	28.3656
AD31	IL17A	23.0404	23.0699	10.19	5.15
AD31	IL17A	23.0994
AD32	IL17A	31.9741	31.9559	9.33	0.02
AD32	IL17A	31.9377
AD33	IL17A	Undetermined	Undetermined	16.54	Undetermined
AD33	IL17A	Undetermined
AD34	IL17A	25.8389	25.9097	9.34	0.59
AD34	IL17A	25.9806
AD35	IL17A	29.3375	29.3775	10.67	0.17
AD35	IL17A	29.4174
AD36	IL17A	33.3254	33.3347	12.01	0.04
AD36	IL17A	33.3441
AD37	IL17A	30.6599	30.779	11.29	0.11
AD37	IL17A	30.898
AD38	IL17A	33.0522	33.1523	12.84	0.07
AD38	IL17A	33.2523
AD39	IL17A	Undetermined	Undetermined	10.96	Undetermined
AD39	IL17A	Undetermined
AD40	IL17A	27.1046	27.2226	10.04	0.41
AD40	IL17A	27.3405
AD41	IL17A	Undetermined	Undetermined	15.34	Undetermined
AD41	IL17A	Undetermined
HC1	IL17A	28.2641	28.2912	11.48	0.51
HC1	IL17A	28.3183
HC2	IL17A	28.1932	28.2028	13.07	1.37
HC2	IL17A	28.2123
HC3	IL17A	Undetermined	Undetermined	13.84	Undetermined
HC3	IL17A	Undetermined
HC4	IL17A	Undetermined	Undetermined	13.28	Undetermined
HC4	IL17A	Undetermined
HC5	IL17A	Undetermined	Undetermined	12.49	Undetermined
HC5	IL17A	Undetermined
HC6	IL17A	32.0705	32.0162	13.43	0.19
HC6	IL17A	31.9619
HC7	IL17A	28.1899	28.2962	11.67	0.57
HC7	IL17A	28.4026
HC8	IL17A	Undetermined	Undetermined	12.67	Undetermined
HC8	IL17A	Undetermined

## Sheet: IFNg
Sample	Assay	Ct Value	Mean Ct IFNg	Mean Ct RPLP0	Normalization (1,8e(Ct RPLP0 - Ct gene)*10000)
AD1	IFNG	26.8178	26.8185	11.93	1.58
AD1	IFNG	26.8191
AD2	IFNG	25.7003	25.777	12.66	4.49
AD2	IFNG	25.8536
AD3	IFNG	30.9065	30.9942	13.42	0.33
AD3	IFNG	31.082
AD4	IFNG	26.9263	27.0341	11.92	1.39
AD4	IFNG	27.1419
AD5	IFNG	26.0206	26.034	11.41	1.85
AD5	IFNG	26.0473
AD6	IFNG	27.7787	27.7841	12.32	1.13
AD6	IFNG	27.7895
AD7	IFNG	29.4563	29.5155	14.14	1.19
AD7	IFNG	29.5746
AD8	IFNG	26.5215	26.5725	12.16	2.09
AD8	IFNG	26.6235
AD9	IFNG	23.6269	23.6555	11.45	7.65
AD9	IFNG	23.6841
AD10	IFNG	27.0769	27.0769	11.82	1.27
AD10	IFNG	Undetermined
AD11	IFNG	28.9071	28.9445	12.46	0.62
AD11	IFNG	28.9818
AD12	IFNG	26.9855	27.0806	11.32	0.95
AD12	IFNG	27.1757
AD13	IFNG	26.5819	26.5933	11.88	1.75
AD13	IFNG	26.6048
AD14	IFNG	30.5081	30.436	13.83	0.58
AD14	IFNG	30.3639
AD15	IFNG	25.4787	25.556	11.83	3.14
AD15	IFNG	25.6332
AD16	IFNG	27.4566	27.4615	11.66	0.92
AD16	IFNG	27.4664
AD17	IFNG	25.9435	25.7634	11	1.7
AD17	IFNG	25.5833
AD18	IFNG	26.8426	26.8874	9.97	0.48
AD18	IFNG	26.9322
AD19	IFNG	24.4611	24.6059	10.05	1.93
AD19	IFNG	24.7508
AD20	IFNG	27.4796	27.4613	11.99	1.12
AD20	IFNG	27.4431
AD21	IFNG	26.3188	26.3902	12.15	2.31
AD21	IFNG	26.4616
AD22	IFNG	28.463	28.5155	12.84	1
AD22	IFNG	28.5681
AD23	IFNG	26.7992	26.8604	13.61	4.15
AD23	IFNG	26.9217
AD24	IFNG	27.0599	27.2236	12.99	2.33
AD24	IFNG	27.3874
AD25	IFNG	23.5699	23.66	10.41	4.15
AD25	IFNG	23.7501
AD26	IFNG	23.9431	23.9575	10.09	2.89
AD26	IFNG	23.972
AD27	IFNG	27.862	27.9326	10.36	0.33
AD27	IFNG	28.0033
AD28	IFNG	24.155	24.1407	11.22	5.03
AD28	IFNG	24.1264
AD29	IFNG	24.2476	24.1759	9.16	1.47
AD29	IFNG	24.1042
AD30	IFNG	29.4454	29.5688	19.58	28.12
AD30	IFNG	29.6923
AD31	IFNG	Undetermined	Undetermined	27.03	Undetermined
AD31	IFNG	Undetermined
AD32	IFNG	Undetermined	Undetermined	28.93	Undetermined
AD32	IFNG	Undetermined
AD33	IFNG	Undetermined	Undetermined	28.34	Undetermined
AD33	IFNG	Undetermined
AD34	IFNG	Undetermined	Undetermined	26.68	Undetermined
AD34	IFNG	Undetermined
AD35	IFNG	Undetermined	Undetermined	24.96	Undetermined
AD35	IFNG	Undetermined
AD36	IFNG	Undetermined	Undetermined	21.04	Undetermined
AD36	IFNG	Undetermined
AD37	IFNG	28.8806	28.755	10.51	0.22
AD37	IFNG	28.6294
AD38	IFNG	29.2109	29.4692	10.71	0.16
AD38	IFNG	29.7275
AD39	IFNG	28.6152	28.7824	9.34	0.11
AD39	IFNG	28.9496
AD40	IFNG	Undetermined	Undetermined	16.7	Undetermined
AD40	IFNG	Undetermined
AD41	IFNG	Undetermined	Undetermined	15.34	Undetermined
AD41	IFNG	Undetermined
HC1	IFNG	24.6467	24.8115	9.9	1.57
HC1	IFNG	24.9762
HC2	IFNG	28.443	28.5477	10.97	0.33
HC2	IFNG	28.6525
HC3	IFNG	30.2189	30.1072	13.84	0.7
HC3	IFNG	29.9955
HC4	IFNG	31.2369	31.2853	13.28	0.25
HC4	IFNG	31.3337
HC5	IFNG	29.0913	29.0586	12.49	0.59
HC5	IFNG	29.0258
HC6	IFNG	30.9804	30.946	13.43	0.34
HC6	IFNG	30.9116
HC7	IFNG	26.2113	26.3003	11.67	1.84
HC7	IFNG	26.3892
HC8	IFNG	28.8343	28.8825	12.67	0.73
HC8	IFNG	28.9308
